# Supplementary material for: Dual-functional inorganic CuSCN for efficient hole extraction and moisture sealing of MAPbI3 perovskite solar cells
Source: Royal Society of Chemistry journal article supplement (doi:10.1039/d1ma00861g), 2021-12-16
Supplement: d1ma00861g1.pdf [file d1ma00861g1.pdf]

## Dual functional inorganic CuSCN for efficient hole extraction and moisture sealing of perovskite solar cells

Battula Ramya Krishna<sup>1,2,3</sup>, Ganapathy Veerappan<sup>1</sup>, P. Bhyrappa<sup>2</sup>, C. Sudakar<sup>3</sup>, Easwaramoorthi Ramasamy<sup>1\*</sup>

<sup>1</sup>Centre for Solar Energy Materials, International Advanced Research Centre for Powder Metallurgy and New Materials (ARCI), Hyderabad, India

<sup>2</sup>Department of Chemistry, Indian Institute of Technology, Madras, India

<sup>3</sup>Multifunctional Materials Lab, Department of Physics, Indian Institute of Technology, Madras, India

\*Email: [easwar@arci.res.in](mailto:easwar@arci.res.in)

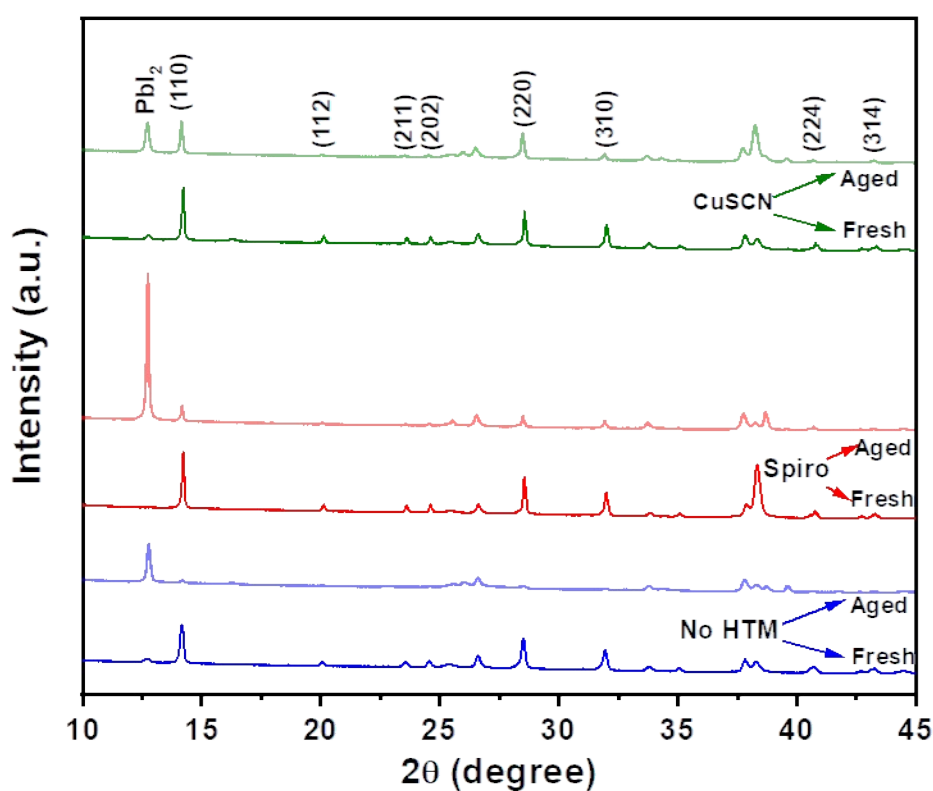

**Figure S1.** XRD pattern of the fresh (bottom) and aged (top) film with no HTM, film coated with organic HTM and inorganic HTM

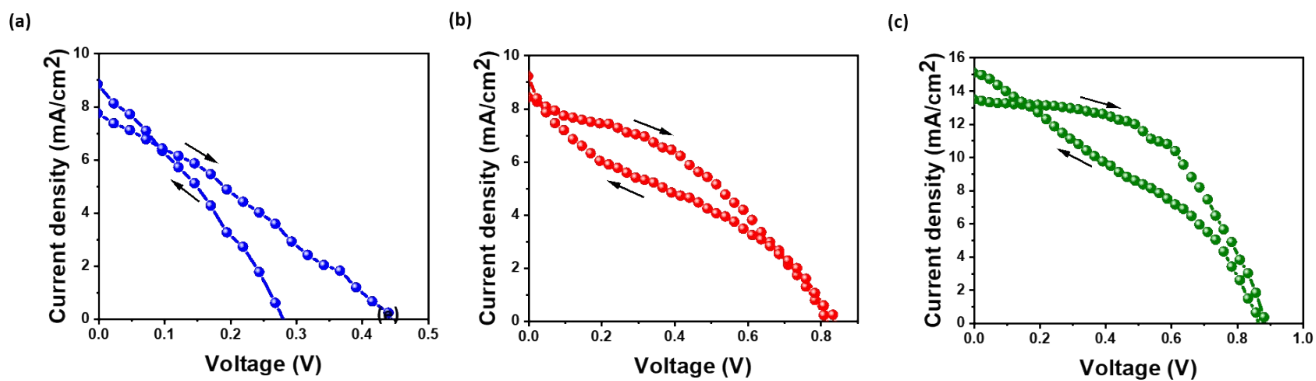

**Figure S2.** I-V characteristics of the aged devices (1500 h at  $25\pm 3$  °C and  $50\pm 10$  % RH) using (a) PSC-HTM free (b) PSC-Spiro (c) PSC-CuSCN.

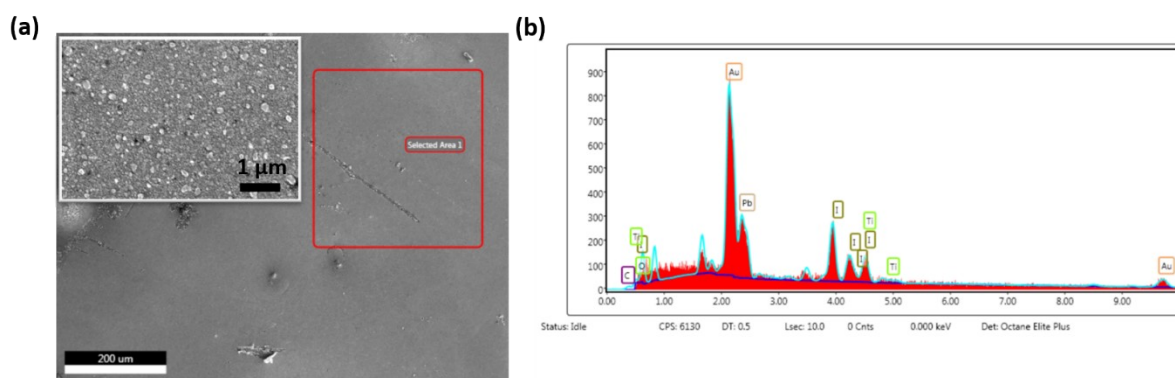

**Figure S3.** (a) FESEM low magnification and inset high magnification image of the Au strip of the device respectively and (b) corresponding EDX spectrum of the selected area marked in red
